# Supplementary material for: Using TOF-SIMS Spectrometry to Study the Kinetics of the Interfacial Retro Diels–Alder Reaction
Source: MDPI journal article supplement (doi:10.3390/ma14102674), 2021-05-20
Supplement: s1 [file s1]

Supplementary Information

# Using TOF-SIMS Spectrometry to Study the Kinetics of the Interfacial Retro Diels–Alder Reaction

Lilia Hassouna <sup>1,2</sup>, Sachin Kumar Enganati <sup>1,2</sup>, Florence Bally-Le Gall <sup>3</sup>, Grégory Mertz <sup>1,\*</sup>, Jérôme Bour <sup>1</sup>, David Ruch <sup>1</sup> and Vincent Roucoules <sup>3</sup>

- <sup>1</sup> Materials and Research Technology Department, Luxembourg Institute of Science and Technology, 5 Avenue des Hauts-Fourneaux, L-4362 Esch-sur-Alzette, Luxembourg; hassounalilia@gmail.com (L.H.); sachinkumar.enganati@list.lu (S.K.E.); jerome.bour@list.lu (J.B.); david.ruch@list.lu (D.R.)
  - <sup>2</sup> Department of Physics and Materials Science, University of Luxembourg, 2 avenue de l'Université, L-4365 Esch-sur-Alzette, Luxembourg
  - <sup>3</sup> University of Haute-Alsace, University of Strasbourg, CNRS, IS2M UMR 7361, F-68100 Mulhouse, France; florence.bally-le-gall@uha.fr (F.B.-L.G.); vincent.roucoules@uha.fr (V.R.)
- \* Correspondence: gregory.mertz@list.lu

**Citation:** Hassouna, L.; Enganati, S.K.; Bally-Le Gall, F.; Mertz, G.; Bour, J.; Ruch, D.; Roucoules, V. Using TOF-SIMS Spectrometry to Study the Kinetics of the Interfacial Retro Diels–Alder Reaction. *Materials* **2021**, *14*, 2674. <https://doi.org/10.3390/ma14102674>

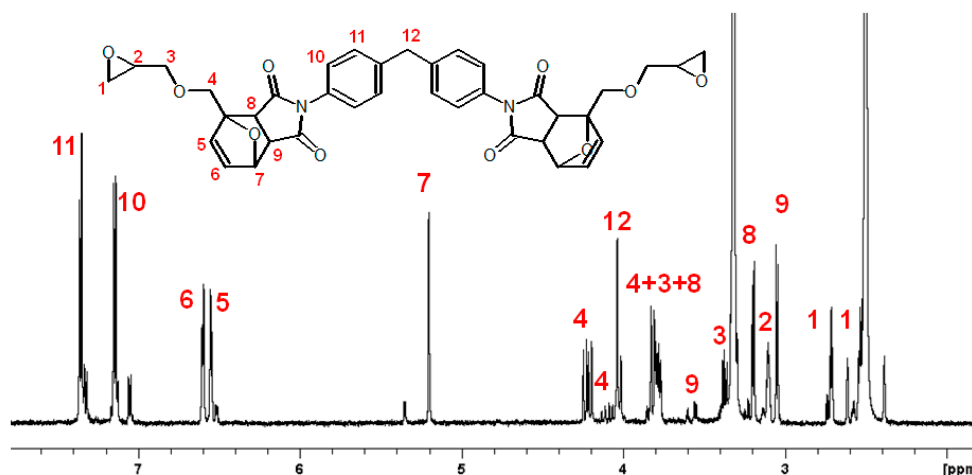

**Figure S1.** <sup>1</sup>H NMR spectrum of the DA molecule in DMSO at 298K.

Academic Editor: Grzegorz Młostoj

Received: 29 March 2021

Accepted: 7 May 2021

Published: 20 May 2021

**Publisher's Note:** MDPI stays neutral with regard to jurisdictional claims in published maps and institutional affiliations.

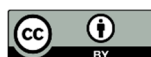

**Copyright:** © 2021 by the authors. Submitted for possible open access publication under the terms and conditions of the Creative Commons Attribution (CC BY) license (<http://creativecommons.org/licenses/by/4.0/>).

**Table S1.** Structural assignments for the main fragments of the adduct molecule detected by MALDI-HRMS.

| N° | Exact Mass | Observed Mass | Chemical Formula            | Secondary Ion Structure                                                             |
|----|------------|---------------|-----------------------------|-------------------------------------------------------------------------------------|
| 1  | 186.0555   | 186.0551      | $C_{11}H_8O_2N^+$           | 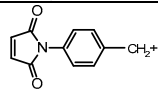 |
| 2  | 381.0846   | 381.0845      | $C_{21}H_{14}O_4N_2Na^+$    |  |
| 3  | 535.1481   | 535.1475      | $C_{29}H_{24}O_7N_2Na^+$    |  |
| 4  | 689.2106   | 689.2108      | $C_{37}H_{34}O_{10}N_2Na^+$ |  |

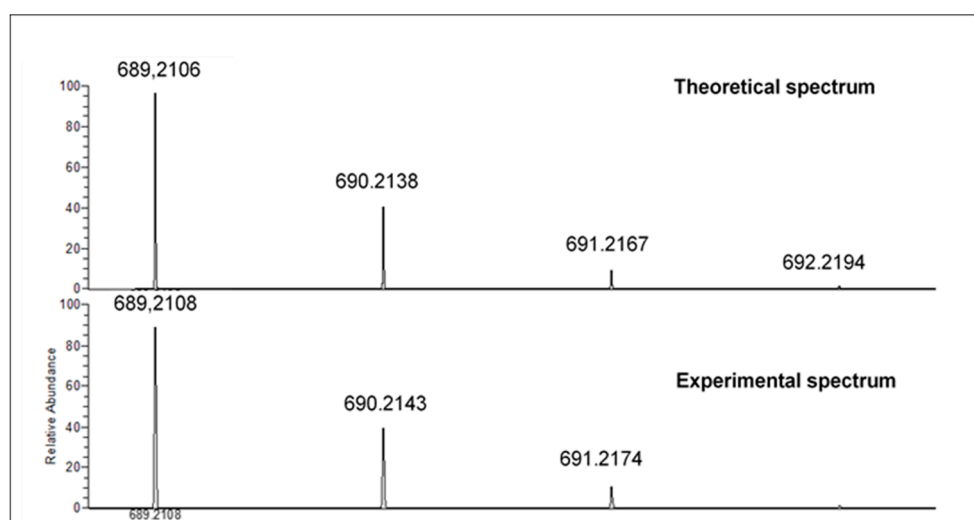

(a)

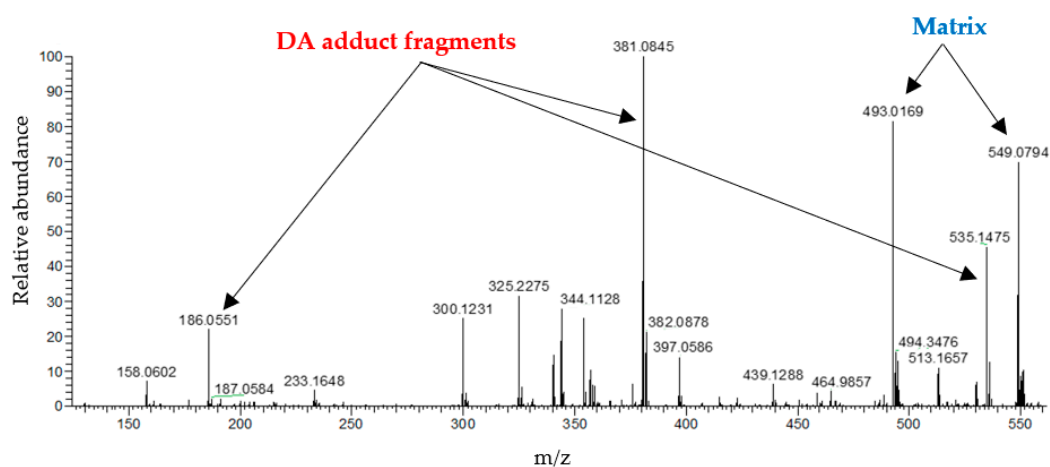

(b)

**Figure S2.** (a) Comparison between experimental and theoretical MALDI-HRMS spectra of the DA adduct-containing molecule (b) Fragments of the DA molecule peaks detected by MALDI-HRMS.

**Table S2.** Values of the maleimide-fragment peak area as determined by TOF-SIMS, on SAMs.

| Time (s) | 333 K  |        |        |        |        | 353 K  |        |        |        |        |
|----------|--------|--------|--------|--------|--------|--------|--------|--------|--------|--------|
| 0        | 0.0655 | 0.0601 | 0.0554 | 0.0352 | 0.0531 | 0.0099 | 0.0104 | 0.0109 | 0.0104 | 0.0102 |
| 900      | -      | -      | -      | -      | -      | 0.0099 | 0.0094 | 0.0070 | 0.0103 | 0.0105 |
| 1,800    | 0.0591 | 0.0538 | 0.0627 | 0.0557 | 0.0610 | 0.0091 | 0.0082 | 0.0093 | 0.0072 | 0.0076 |
| 3,600    | 0.0312 | 0.0313 | 0.0273 | 0.0305 | 0.0327 | 0.0086 | 0.0076 | 0.0072 | 0.0069 | 0.0061 |
| 10,800   | 0.0126 | 0.0116 | 0.0115 | 0.0125 | 0.0127 | 0.0038 | 0.0039 | 0.0037 | 0.0037 | 0.0040 |
| Time (s) | 363 K  |        |        |        |        | 373 K  |        |        |        |        |
| 0        | 0.0253 | 0.0160 | 0.0142 | 0.0142 | 0.0164 | 0.0099 | 0.0104 | 0.0109 | 0.0104 | 0.0102 |
| 900      | 0.0170 | 0.0173 | 0.0166 | 0.0176 | 0.0173 | 0.0079 | 0.0078 | 0.0062 | 0.0078 | 0.0083 |
| 1,800    | 0.0144 | 0.0143 | 0.0154 | 0.0156 | 0.0154 | 0.0068 | 0.0081 | 0.0071 | 0.0069 | 0.0078 |
| 3,600    | 0.0131 | 0.0133 | 0.0134 | 0.0148 | 0.0135 | 0.0054 | 0.0057 | 0.0057 | 0.0060 | 0.0059 |
| 10,800   | 0.0069 | 0.0064 | 0.0062 | 0.0067 | 0.0066 | 0.0057 | 0.0060 | 0.0055 | 0.0059 | 0.0058 |
| Time (s) | 383 K  |        |        |        |        | 393 K  |        |        |        |        |
| 0        | 0.0253 | 0.0160 | 0.0142 | 0.0142 | 0.0164 | 0.0655 | 0.0601 | 0.0554 | 0.0352 | 0.0531 |
| 900      | 0.0142 | 0.0142 | 0.0138 | 0.0133 | 0.0134 | -      | -      | -      | -      | -      |
| 1,800    | -      | -      | -      | -      | -      | 0.0104 | 0.0104 | 0.0102 | 0.0105 | 0.0110 |
| 2,700    | 0.0078 | 0.0066 | 0.0065 | 0.0077 | 0.0077 | -      | -      | -      | -      | -      |
| 3,600    | 0.0058 | 0.0062 | 0.0059 | 0.0057 | 0.0057 | 0.0094 | 0.0079 | 0.0082 | 0.0067 | 0.0083 |

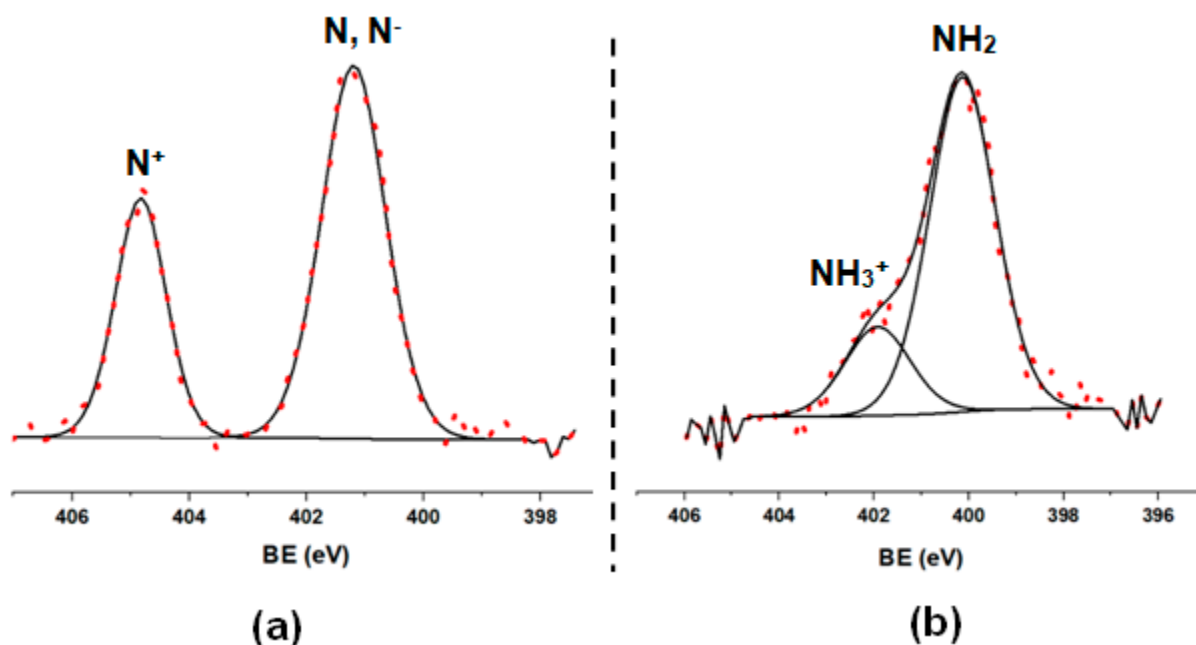**Figure S3.** High resolution XPS N1s spectrum of (a) azide terminated SAMs that were finally transformed to (b) amine-terminated SAMs.

Methodology used for the determination of retro DA reaction conversion using  $^1\text{H}$  NMR.

It is assumed that at the selected temperatures, the reverse reaction (DA reaction) can be neglected. The conversion rate of retro DA reaction ( $X_i$ ) is then determined as the

fraction of formed furfuryl glycidyl ether (FGE), for different times and for different temperatures. It is calculated by the following formula: 
$$X_i = \frac{A_{FGE}}{A_{FGE} + A_{Add}}$$

$A_{FGE}$ ,  $A_{Add}$  are respectively the area of the peak characteristic of one proton in furan group (highlighted in Figure S1a) and the area of a peak representing one proton of the adduct (highlighted in Figure S1c).

The retro DA reaction conversion values of can be found in Table S2.

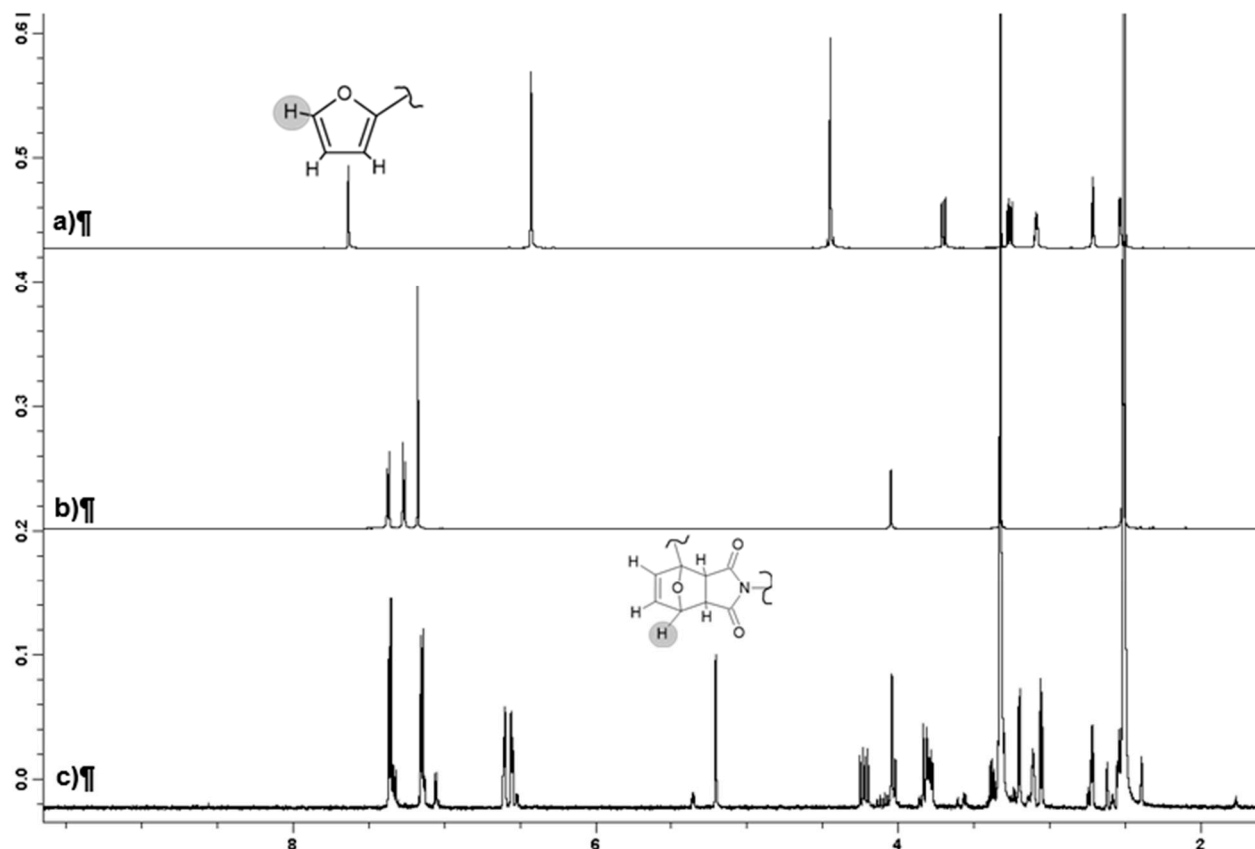

**Figure S4.**  $^1\text{H}$  NMR spectra of (a) furfuryl glycidyl ether, (b) bismaleimide and (c) synthesised molecule containing the adduct.

**Table S3.** Retro DA conversion values determined by  $^1\text{H}$  NMR spectrometry, for different temperatures.

| Time (s) | 343 K |       |       | 353 K |       |       |
|----------|-------|-------|-------|-------|-------|-------|
| 0        | 0.142 | 0.029 | 0.038 | 0.040 | 0.028 | 0.043 |
| 60       | 0.155 | 0.062 | 0.048 | 0.167 | 0.124 | 0.178 |
| 900      | 0.266 | 0.062 | 0.048 | 0.230 | 0.229 | 0.231 |
| 1,800    | 0.305 | 0.111 | 0.075 | 0.330 | 0.255 | 0.309 |
| 2,700    | 0.317 | 0.111 | 0.090 | 0.385 | 0.321 | 0.412 |
| 3,600    | 0.270 | 0.140 | 0.147 | 0.437 | 0.385 | 0.398 |
| 7,200    | 0.314 | 0.202 | 0.253 | 0.596 | 0.532 | 0.664 |
| 10,800   | 0.356 | 0.303 | 0.315 | 0.730 | 0.656 | 0.773 |
| 18,000   | -     | 0.384 | 0.425 | 0.842 | 0.839 | 0.888 |
| 25,200   | -     | 0.498 | 0.528 | 0.900 | 0.888 | 0.942 |

  

| Time (s) | 358 K |       |   | 363 K |       |       |
|----------|-------|-------|---|-------|-------|-------|
| 0        | 0.040 | 0.043 | - | 0     | 0.034 | 0     |
| 60       | 0.196 | 0.199 | - | 0.285 | 0.291 | 0.285 |
| 900      | 0.348 | 0.324 | - | 0.436 | 0.463 | 0.436 |
| 1,800    | 0.476 | 0.473 | - | 0.559 | 0.606 | 0.559 |
| 2,700    | 0.579 | 0.543 | - | 0.684 | 0.674 | 0.684 |
| 3,600    | 0.678 | 0.649 | - | 0.75  | 0.773 | 0.75  |
| 7,200    | 0.854 | 0.837 | - | 1     | 0.886 | 1     |
| 10,800   | 0.933 | 0.919 | - | 1     | 0.957 | 1     |
| 18,000   | 0.983 | 0.983 | - | 1     | 0.942 | 1     |
| 25,200   | 1     | 0.988 | - | 1     | 0.955 | 1     |

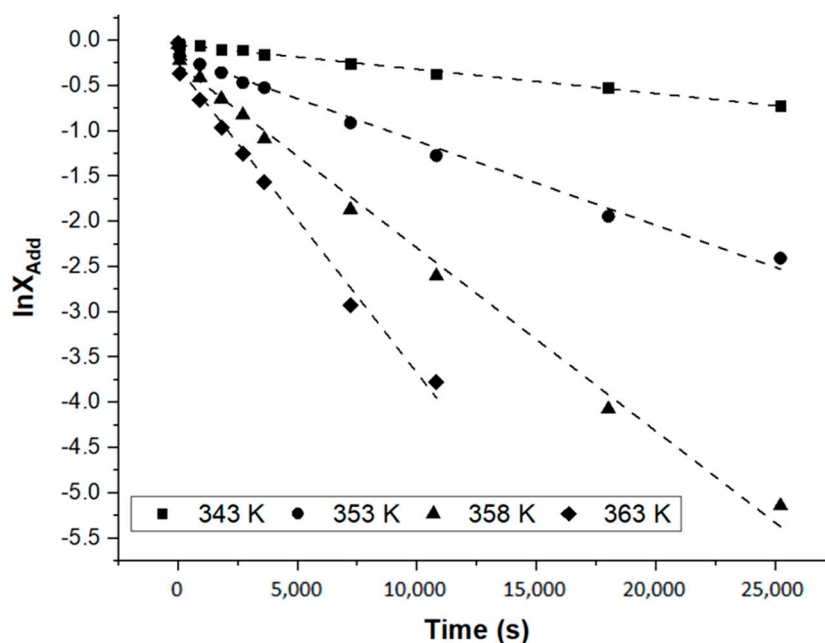**Figure S5.** Linearization, according to a first order, of retro DA reaction rate law occurring in the DA molecule in solution performed at different temperatures.
